# Supplementary material
Source: Research Square preprint supplement (doi:10.21203/rs.3.rs-10111437/v1)
Supplement: Supplementary file 1 [file 75cd68b26db84efad43fe20a.docx]

**Appendix A. Persistence of the instrument**

The predicted-regulation instrument is highly persistent, which is why a future-instrument placebo is uninformative: the lead of the instrument is mechanically close to its current value. Within-industry autocorrelations of log predicted regulation are 0.95 at one year, 0.84 at three years, 0.75 at five years, and 0.42 at ten years; the within-industry AR(1) coefficient is 0.95. A five-year lead still correlates 0.75 with the current value.

**Appendix B. Regulatory complexity**

Complexity is a secondary result and is not separately identified from regulatory volume. Colliard and Georg (2025) show that regulatory complexity is multidimensional and cannot be reduced to document length alone; the conditional-clause measure used here captures only one textual dimension. Within industry and year, RegData's conditional-clause complexity and the restriction count are correlated at about 0.94, so a single shift-share instrument cannot tell them apart: instrumenting volume gives an entry estimate near -0.36, and instrumenting complexity with the same shift-share gives a similar figure. The two are not distinguishable in this design, so I report volume as the treatment in the main text and treat complexity as descriptive.
